# Supplementary material for: Characterization of Latex-Clearing Protein and Aldehyde Dehydrogenases Involved in the Utilization of poly(cis-1,4-isoprene) by Nocardia farcinica NBRC 15532
Source: MDPI journal article supplement (doi:10.3390/microorganisms10122324), 2022-11-24
Supplement: s1 [file s1]

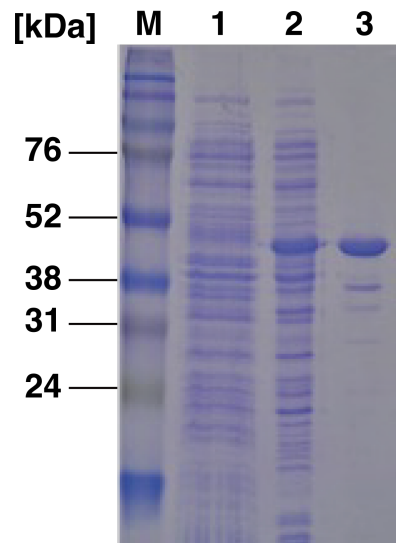

**Figure S1.** SDS-PAGE analysis of protein fractions. Proteins were separated on a SDS-12% polyacrylamide gel and stained with Coomassie brilliant blue. Lanes; M, molecular weight markers; 1, crude extract of *E. coli* BL21(DE3) carrying pColdI expression vector; 2, crude extract of *E. coli* BL21(DE3) containing his-tagged *lcp*; 3, purified his-tagged Lcp. Molecular masses are given on the left.

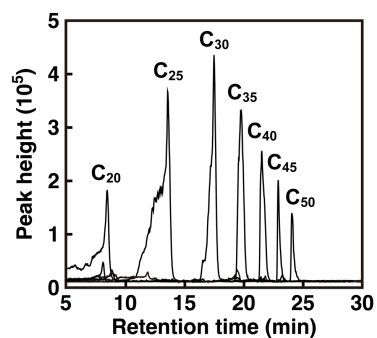

**Figure S2.** Extracted ion chromatogram of oligo-isoprene aldehydes generated from poly(*cis*-1,4-isoprene). After the Lcp reaction, the molecular mass of the reaction products containing oligo-isoprene aldehydes were analyzed by LC-MS. The reaction mixture containing 25 mg poly(*cis*-1,4-isoprene) and 150  $\mu$ g of purified Lcp was incubated for 12 h.

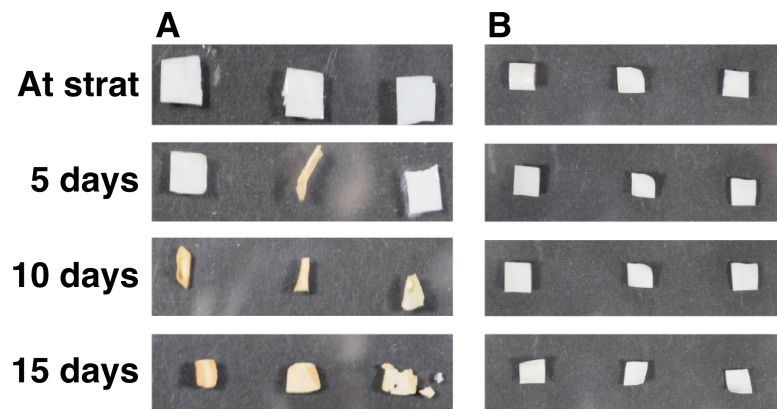

**Figure S3.** The pieces of NR glove after incubated with *N. farcinica* NBRC 15532 (A) and the *lcp* deletion mutant (B). The NR pieces were prepared by cutting NR glove into 1 cm squares. The cells of wild type and its mutant were incubated at 37°C for 5, 10, and 15 days.

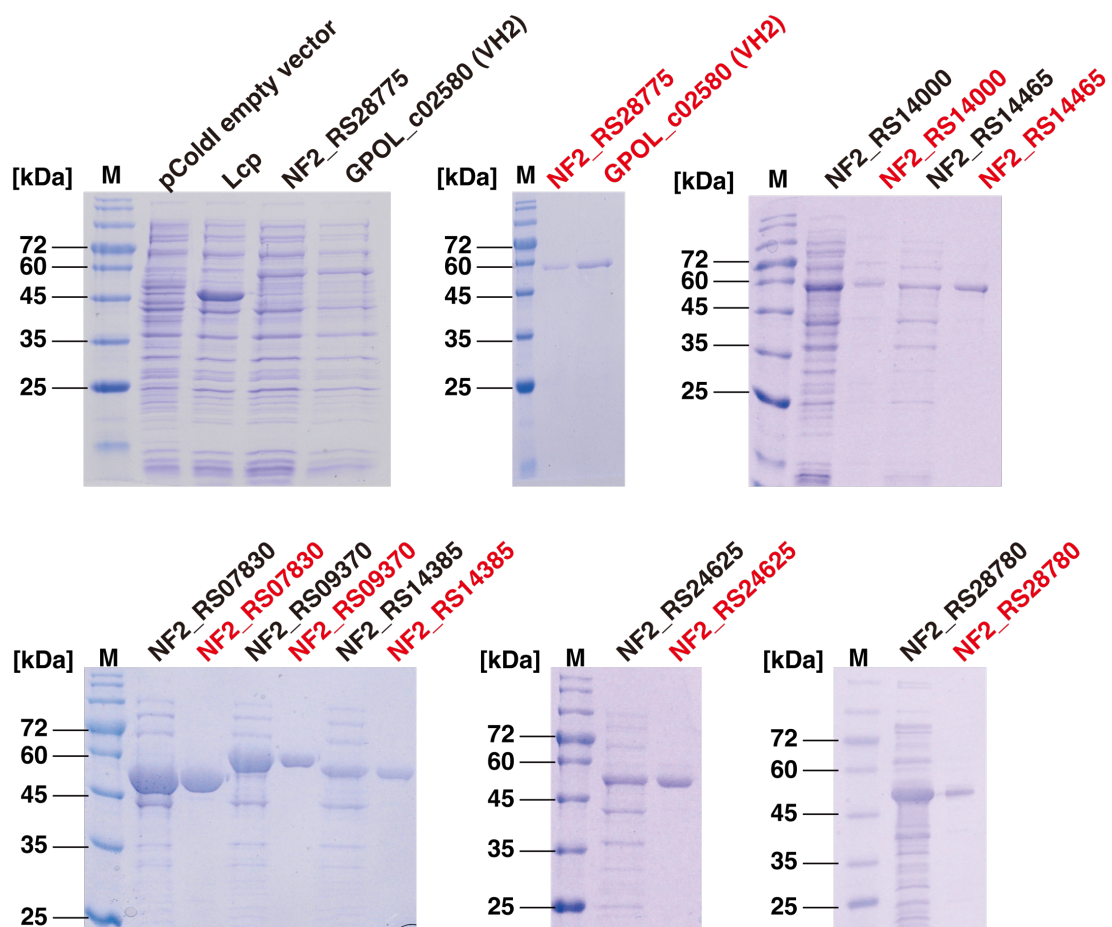

**Figure S4.** SDS-PAGE analysis of protein fractions. Proteins were separated on a SDS-12% polyacrylamide gel and stained with Coomassie brilliant blue. Lanes; M, molecular weight markers; Fractions of crude extract of *E. coli* BL21(DE3) carrying each plasmid vector and purified his-tagged protein are shown in black and red, respectively. Molecular masses are given on the left.
